# Supplementary material for: Stability of SARS-CoV-2 on critical personal protective equipment
Source: PubMed Central journal article supplement (PMC7806900; doi:10.1038/s41598-020-80098-3), 2021-01-13
Supplement: 41598_2020_80098_MOESM1_ESM.pdf [file 41598_2020_80098_MOESM1_ESM.pdf]

## Stability of SARS-CoV-2 on Critical Personal Protective Equipment

Samantha B Kasloff<sup>1\*</sup>; Anders Leung<sup>1</sup>, James E Strong<sup>1,2,3</sup>; Duane Funk<sup>4</sup>; and Todd Cutts<sup>1\*#</sup>

<sup>1</sup>National Microbiology Laboratory, Public Health Agency of Canada, 1015 Arlington Street, Winnipeg, Manitoba, R3E 3R2, Canada.

<sup>2</sup>Department of Pediatrics & Child Health, College of Medicine, Faculty of Health Sciences, University of Manitoba, Winnipeg, Manitoba, Canada.

<sup>3</sup>Department of Infectious Diseases and Medical Microbiology, College of Medicine, Faculty of Health Sciences, University of Manitoba, Winnipeg, Manitoba

<sup>4</sup>Department of Anaesthesia and Medicine, College of Medicine, Faculty of Health Sciences, University of Manitoba, Winnipeg, Manitoba, Canada.

\*These authors contributed equally to this work.

#Corresponding Author: [Todd.Cutts@canada.ca](mailto:Todd.Cutts@canada.ca)

Supplementary Table. Recovery of viable SARS-CoV-2 on experimentally inoculated environmental surfaces (Log10 TCID<sub>50</sub>/mL)

| Sampling Time          | Stainless steel   |        | Tyvek    |        | Plastic   |        | Nitrile gloves |        | Chemical gloves |        | Mask 1   |        | Mask 2    |        | Cotton      |        |
|------------------------|-------------------|--------|----------|--------|-----------|--------|----------------|--------|-----------------|--------|----------|--------|-----------|--------|-------------|--------|
|                        | Mean <sup>a</sup> | +/- SD | Mean     | +/- SD | Mean      | +/- SD | Mean           | +/- SD | Mean            | +/- SD | Mean     | +/- SD | Mean      | +/- SD | Mean        | +/- SD |
| 1 hr                   | 5.58              | 0.14   | 5.50     | 0.00   | 5.75      | 0.66   | 5.92           | 0.29   | 3.42            | 2.01   | 5.75     | 0.50   | 5.75      | 0.25   | 1.42        | 0.14   |
| 4 hrs                  | 5.25              | 0.50   | 5.17     | 0.52   | 5.92      | 0.63   | 5.67           | 0.52   | 2.25            | 1.30   | 5.50     | 0.25   | 5.17      | 0.14   | 1.08        | 0.95   |
| 1 day                  | 4.39              | 0.13   | 4.50     | 0.43   | 4.50      | 0.25   | 3.67           | 0.14   | 1.58            | 0.14   | 4.67     | 0.14   | 4.58      | 0.80   | -           | -      |
| 2 days                 | 3.58              | 0.14   | 3.58     | 0.14   | 3.75      | 0.43   | 3.00           | 0.66   | 1.92            | 0.29   | 3.75     | 0.00   | 3.58      | 0.38   | -           | -      |
| 3 days                 | 3.00              | 0.00   | 3.33     | 0.14   | 3.42      | 0.14   | 2.67           | 0.14   | 1.58            | 0.14   | 3.50     | 0.25   | 3.33      | 0.29   | -           | -      |
| 4 days                 | 3.33              | 0.14   | 3.00     | 0.25   | 3.42      | 0.14   | 3.25           | 1.09   | 1.75            | 0.43   | 3.75     | 0.43   | 3.33      | 0.29   | -           | -      |
| 7 days                 | 2.42              | 0.29   | 2.00     | 0.25   | 2.00      | 0.43   | 1.50           | 0.25   | -               | -      | 2.33     | 0.38   | 2.33      | 0.38   | -           | -      |
| 14 days                | 0.75              | 0.66   | 0.67     | 0.63   | 1.01      | 0.24   | -              | -      | -               | -      | 1.26     | 0.42   | 1.17      | 0.37   | -           | -      |
| 21 days                | -                 | -      | -        | -      | 0.26*     | 0.44   | -              | -      | -               | -      | 0.83     | 0.76   | 0.26*     | 0.44   | -           | -      |
| Half Life <sup>b</sup> | 3.625 hrs         |        | 2.86 hrs |        | 13.34 hrs |        | 9.873 hrs      |        | 0.4204 hrs      |        | 5.78 hrs |        | 2.631 hrs |        | 0.06885 hrs |        |

<sup>a</sup> Mean TCID<sub>50</sub> values calculated from three independent biological replicates. Limit of detection was Log(0.767) TCID<sub>50</sub>/mL

<sup>b</sup> Half lives calculated using one phase exponential decay regression analysis in GraphPad Prism (version 7) software

( - ) = no CPE detected in any biological replicate at any dilution of eluted material.

\* presence of viable virus confirmed upon subpassage
